# Supplementary material for: Food Production Scheduling: A Thorough Comparative Study between Optimization and Rule-Based Approaches
Source: MDPI journal article supplement (doi:10.3390/pr11071950), 2023-06-27
Supplement: s1 [file s1]

# Supplementary Materials

This section contains the data utilized to derive the current research paper. Data regarding the KRI-KRI facility and cases A are available in unit 1, while data regarding the TYRAS facility and cases B are available in unit 2. It is noted that the data are slightly altered for confidentiality issues.

## 1. KRI-KRI facility data

Tables S1–S5 contain data concerning the KRI-KRI facility and case studies A. In Table S1 there is a description of the annotations used to refer to the problem’s basic elements. Information about products characteristics, production restrictions and storage costs is available at Table S2. It is noted that J5 represents the additional packing line considered in plant capacity expansion cases and is either identical to J1 or J2. In Table S3 the studied product demand is depicted. Table S4 contains the changeover costs based on the changeover duration. Finally, Table S5 provides information regarding families changeover times.

**Table S1.** Annotations used for cases of the KRI-KRI facility.

|                            |                |
|----------------------------|----------------|
| Products                   | <b>P01-P93</b> |
| Recipes                    | <b>R01-R12</b> |
| Families                   | <b>F01-F23</b> |
| Packing lines              | <b>J1-J5</b>   |
| Scheduling horizon in days | <b>1-5</b>     |

**Table S2.** Product characteristics for cases of the KRI-KRI facility.

| <b>Product</b> | <b>Weight<br/>(kg)</b> | <b>Family</b> | <b>Recipe</b> | <b>Line</b> | <b>Packing<br/>rate (kg/h)</b> | <b>Min<br/>amount (kg)</b> | <b>Inventory<br/>cost (€/kg)</b> |
|----------------|------------------------|---------------|---------------|-------------|--------------------------------|----------------------------|----------------------------------|
| P01            | 0.60                   | F01           | R08           | J3          | 1710                           | 82.8                       | 9.00                             |
| P02            | 0.60                   | F01           | R08           | J3          | 1710                           | 82.8                       | 7.50                             |
| P03            | 0.60                   | F01           | R08           | J3          | 1710                           | 82.8                       | 6.75                             |
| P04            | 0.60                   | F01           | R08           | J3          | 1710                           | 82.8                       | 6.00                             |
| P05            | 0.60                   | F01           | R08           | J3          | 1710                           | 82.8                       | 6.00                             |
| P06            | 0.60                   | F02           | R09           | J3          | 1710                           | 82.8                       | 6.00                             |
| P07            | 0.60                   | F02           | R09           | J3          | 1710                           | 82.8                       | 5.25                             |
| P08            | 0.60                   | F02           | R09           | J3          | 1710                           | 82.8                       | 5.25                             |
| P09            | 0.60                   | F03           | R10           | J3          | 1710                           | 82.8                       | 6.00                             |
| P10            | 0.60                   | F03           | R10           | J3          | 1710                           | 82.8                       | 5.25                             |
| P11            | 0.60                   | F03           | R10           | J3          | 1710                           | 82.8                       | 5.25                             |
| P12            | 0.60                   | F04           | R01           | J3          | 1710                           | 82.8                       | 8.25                             |
| P13            | 0.60                   | F04           | R01           | J3          | 1710                           | 82.8                       | 6.75                             |
| P14            | 0.60                   | F04           | R01           | J3          | 1710                           | 82.8                       | 6.00                             |
| P15            | 0.60                   | F04           | R01           | J3          | 1710                           | 82.8                       | 5.25                             |
| P16            | 0.60                   | F04           | R01           | J3          | 1710                           | 82.8                       | 5.25                             |

| Product | Weight<br>(kg) | Family | Recipe | Line  | Packing<br>rate (kg/h) | Min<br>amount (kg) | Inventory<br>cost (€/kg) |
|---------|----------------|--------|--------|-------|------------------------|--------------------|--------------------------|
| P17     | 0.60           | F05    | R02    | J3    | 1710                   | 82.8               | 9.00                     |
| P18     | 0.60           | F05    | R02    | J3    | 1710                   | 82.8               | 6.75                     |
| P19     | 0.60           | F05    | R02    | J3    | 1710                   | 82.8               | 7.50                     |
| P20     | 0.60           | F05    | R02    | J3    | 1710                   | 82.8               | 6.00                     |
| P21     | 0.20           | F05    | R02    | J3    | 1820                   | 27.6               | 5.70                     |
| P22     | 0.20           | F05    | R02    | J3    | 1820                   | 27.6               | 5.70                     |
| P23     | 0.40           | F06    | R07    | J3/J4 | 1320/1150              | 55.2               | 0.75                     |
| P24     | 0.20           | F06    | R07    | J3/J4 | 1390/1204              | 27.6               | 0.75                     |
| P25     | 0.20           | F06    | R07    | J3/J4 | 1390/1204              | 27.6               | 0.75                     |
| P26     | 0.38           | F07    | R07    | J3    | 1140                   | 19.8               | 0.75                     |
| P27     | 0.38           | F07    | R07    | J3    | 1140                   | 19.8               | 0.75                     |
| P28     | 0.40           | F08    | R11    | J3/J4 | 2400/2700              | 55.2               | 1.35                     |
| P29     | 0.40           | F08    | R11    | J3/J4 | 2400/2700              | 55.2               | 1.35                     |
| P30     | 0.60           | F08    | R11    | J3/J4 | 2250/2520              | 82.8               | 1.65                     |
| P31     | 0.60           | F08    | R11    | J3/J4 | 2250/2520              | 82.8               | 1.65                     |
| P32     | 0.60           | F08    | R11    | J3/J4 | 2250/2520              | 82.8               | 1.65                     |
| P33     | 0.60           | F08    | R11    | J3/J4 | 2250/2520              | 82.8               | 1.65                     |
| P34     | 0.45           | F09    | R11    | J3/J4 | 1215                   | 62.1               | 0.45                     |
| P35     | 0.45           | F09    | R11    | J3/J4 | 1215                   | 62.1               | 0.45                     |
| P36     | 0.15           | F09    | R11    | J3/J4 | 1350                   | 20.7               | 1.20                     |
| P37     | 0.15           | F09    | R11    | J3/J4 | 1350                   | 20.7               | 1.20                     |
| P38     | 0.15           | F09    | R11    | J3/J4 | 1350                   | 20.7               | 1.20                     |
| P39     | 0.13           | F10    | R11    | J3/J4 | 850                    | 11.3               | 1.80                     |
| P40     | 0.13           | F10    | R11    | J3/J4 | 850                    | 11.3               | 1.80                     |
| P41     | 0.13           | F10    | R11    | J3/J4 | 850                    | 11.3               | 1.80                     |
| P42     | 1.00           | F11    | R01    | J2/J5 | 2200                   | 33.0               | 3.30                     |
| P43     | 1.00           | F11    | R01    | J2/J5 | 2200                   | 33.0               | 4.20                     |
| P44     | 1.00           | F11    | R01    | J2/J5 | 2200                   | 33.0               | 4.20                     |
| P45     | 1.00           | F12    | R02    | J2/J5 | 2200                   | 33.0               | 4.20                     |
| P46     | 1.00           | F12    | R02    | J2/J5 | 2200                   | 33.0               | 3.00                     |
| P47     | 1.00           | F12    | R02    | J2/J5 | 2200                   | 33.0               | 3.00                     |
| P48     | 1.00           | F13    | R03    | J2/J5 | 2200                   | 33.0               | 2.55                     |
| P49     | 1.00           | F13    | R03    | J2/J5 | 2200                   | 33.0               | 2.10                     |
| P50     | 1.00           | F13    | R03    | J2/J5 | 2200                   | 33.0               | 2.10                     |
| P51     | 1.00           | F14    | R04    | J2/J5 | 2200                   | 33.0               | 3.60                     |
| P52     | 1.00           | F14    | R04    | J2/J5 | 2200                   | 33.0               | 3.60                     |
| P53     | 0.50           | F15    | R04    | J2/J5 | 1150                   | 28.0               | 3.60                     |
| P54     | 0.50           | F15    | R04    | J2/J5 | 1150                   | 28.0               | 3.60                     |
| P55     | 0.50           | F16    | R11    | J2/J5 | 1150                   | 16.5               | 1.80                     |
| P56     | 0.50           | F16    | R11    | J2/J5 | 1150                   | 16.5               | 1.80                     |
| P57     | 0.50           | F16    | R11    | J2/J5 | 1150                   | 16.5               | 1.80                     |
| P58     | 0.50           | F16    | R11    | J2/J5 | 1150                   | 16.5               | 1.80                     |
| P59     | 0.50           | F16    | R11    | J2/J5 | 1150                   | 16.5               | 1.80                     |

| Product | Weight<br>(kg) | Family | Recipe | Line  | Packing<br>rate (kg/h) | Min<br>amount (kg) | Inventory<br>cost (€/kg) |
|---------|----------------|--------|--------|-------|------------------------|--------------------|--------------------------|
| P60     | 0.50           | F16    | R11    | J2/J5 | 1150                   | 16.5               | 1.80                     |
| P61     | 0.75           | F17    | R11    | J2/J5 | 1320                   | 27.0               | 0.90                     |
| P62     | 0.75           | F17    | R11    | J2/J5 | 1320                   | 27.0               | 0.90                     |
| P63     | 0.75           | F17    | R11    | J2/J5 | 1320                   | 27.0               | 0.90                     |
| P64     | 0.75           | F17    | R11    | J2/J5 | 1320                   | 27.0               | 0.60                     |
| P65     | 0.75           | F17    | R11    | J2/J5 | 1320                   | 27.0               | 0.90                     |
| P66     | 0.75           | F17    | R11    | J2/J5 | 1320                   | 27.0               | 0.60                     |
| P67     | 0.75           | F17    | R11    | J2/J5 | 1320                   | 27.0               | 0.90                     |
| P68     | 0.75           | F17    | R11    | J2/J5 | 1320                   | 27.0               | 0.60                     |
| P69     | 0.75           | F17    | R11    | J2/J5 | 1320                   | 27.0               | 0.90                     |
| P70     | 0.75           | F17    | R11    | J2/J5 | 1320                   | 27.0               | 0.60                     |
| P71     | 0.75           | F17    | R11    | J2/J5 | 1320                   | 27.0               | 0.60                     |
| P72     | 1.00           | F18    | R07    | J2/J5 | 2100                   | 33.0               | 0.75                     |
| P73     | 1.00           | F18    | R07    | J2/J5 | 2100                   | 33.0               | 0.75                     |
| P74     | 1.00           | F19    | R06    | J2/J5 | 2100                   | 33.0               | 0.45                     |
| P75     | 1.00           | F19    | R06    | J2/J5 | 2100                   | 33.0               | 0.75                     |
| P76     | 1.00           | F19    | R06    | J2/J5 | 2100                   | 33.0               | 0.75                     |
| P77     | 5.00           | F20    | R05    | J1/J5 | 2250                   | 80.0               | 3.30                     |
| P78     | 5.00           | F20    | R05    | J1/J5 | 2100                   | 80.0               | 3.60                     |
| P79     | 5.00           | F20    | R05    | J1/J5 | 2100                   | 80.0               | 3.60                     |
| P80     | 30.00          | F21    | R06    | J1/J5 | 2790                   | 90.0               | 0.45                     |
| P81     | 30.00          | F21    | R06    | J1/J5 | 2790                   | 90.0               | 0.75                     |
| P82     | 30.00          | F21    | R06    | J1/J5 | 2790                   | 90.0               | 0.75                     |
| P83     | 10.00          | F22    | R06    | J1/J5 | 2350                   | 100.0              | 0.75                     |
| P84     | 10.00          | F22    | R06    | J1/J5 | 2350                   | 100.0              | 0.45                     |
| P85     | 5.00           | F22    | R06    | J1/J5 | 2250                   | 80.0               | 0.30                     |
| P86     | 5.00           | F22    | R06    | J1/J5 | 2250                   | 80.0               | 0.45                     |
| P87     | 5.00           | F22    | R06    | J1/J5 | 2150                   | 80.0               | 0.75                     |
| P88     | 5.00           | F22    | R06    | J1/J5 | 2150                   | 80.0               | 0.45                     |
| P89     | 5.00           | F22    | R06    | J1/J5 | 2150                   | 80.0               | 0.45                     |
| P90     | 0.15           | F23    | R12    | J4    | 690                    | 32.3               | 1.80                     |
| P91     | 0.15           | F23    | R12    | J4    | 690                    | 32.3               | 1.80                     |
| P92     | 0.15           | F23    | R12    | J4    | 690                    | 32.3               | 1.80                     |
| P93     | 0.15           | F23    | R12    | J4    | 690                    | 32.3               | 1.80                     |

**Table S3.** Product demand for cases of the KRI-KRI facility.

| Day |      |      |      |   | Day |   |   |   |      |
|-----|------|------|------|---|-----|---|---|---|------|
| 1   | 2    | 3    | 4    | 5 | 1   | 2 | 3 | 4 | 5    |
| P01 | 2349 |      |      |   | P48 |   |   |   | 2132 |
| P02 |      | 1314 |      |   | P49 |   |   |   | 5495 |
| P03 |      |      | 2650 |   | P50 |   |   |   | 1830 |

| Day |      |      |      |      | Day |      |       |       |      |
|-----|------|------|------|------|-----|------|-------|-------|------|
| 1   | 2    | 3    | 4    | 5    | 1   | 2    | 3     | 4     | 5    |
| P04 | 3678 |      |      | 8401 | P51 |      |       |       | 9380 |
| P05 |      |      |      | 3288 | P52 |      |       |       | 1272 |
| P06 |      |      | 3533 |      | P53 |      |       |       | 658  |
| P07 |      |      |      | 6745 | P54 |      |       |       | 658  |
| P08 |      |      |      | 2400 | P55 |      |       | 2391  |      |
| P09 |      |      | 1133 |      | P56 |      |       | 2158  |      |
| P10 |      |      |      | 737  | P57 |      |       | 1581  |      |
| P11 |      |      |      | 429  | P58 |      |       | 1594  |      |
| P12 | 2136 |      |      |      | P59 |      |       | 1594  |      |
| P13 |      | 2529 |      |      | P60 |      |       | 1158  |      |
| P14 |      |      | 2650 |      | P61 |      |       |       | 1056 |
| P15 |      |      |      | 3805 | P62 |      |       |       | 947  |
| P16 |      |      |      | 2229 | P63 | 4315 |       |       |      |
| P17 | 1391 |      |      |      | P64 | 1439 |       |       |      |
| P18 |      |      | 1555 |      | P65 | 2736 |       |       |      |
| P19 |      | 3683 |      |      | P66 |      |       |       | 1472 |
| P20 |      |      |      | 3888 | P67 | 1986 |       |       |      |
| P21 |      |      |      | 324  | P68 |      |       |       | 3512 |
| P22 |      |      |      | 276  | P69 | 1722 |       |       |      |
| P23 |      |      | 6927 |      | P70 |      |       |       | 408  |
| P24 |      |      | 839  |      | P71 |      |       |       | 164  |
| P25 |      |      | 2995 |      | P72 | 2199 |       | 2040  |      |
| P26 | 1775 |      |      |      | P73 | 1283 |       |       |      |
| P27 | 504  |      |      |      | P74 |      |       |       | 40   |
| P28 | 1325 |      |      |      | P75 |      |       |       | 1071 |
| P29 | 1325 |      |      |      | P76 |      |       |       | 117  |
| P30 |      |      |      | 2209 | P77 |      |       |       | 285  |
| P31 |      |      |      | 2881 | P78 |      |       |       | 6740 |
| P32 |      |      |      | 4949 | P79 |      |       |       | 975  |
| P33 |      |      |      | 2434 | P80 |      | 28800 |       |      |
| P34 | 1112 |      |      |      | P81 |      | 34800 |       |      |
| P35 | 1112 |      |      |      | P82 |      | 27000 |       |      |
| P36 | 3974 |      |      |      | P83 |      |       |       | 7100 |
| P37 | 1430 |      |      |      | P84 |      |       |       | 2900 |
| P38 | 708  |      |      |      | P85 |      |       |       | 1000 |
| P39 |      |      |      | 512  | P86 |      |       |       | 2590 |
| P40 |      |      |      | 718  | P87 |      |       |       | 5650 |
| P41 |      |      |      | 147  | P88 |      |       |       | 7210 |
| P42 |      |      | 3300 |      | P89 |      |       | 15750 |      |
| P43 |      |      |      | 1807 | P90 | 471  |       |       | 1521 |
| P44 |      |      |      | 2019 | P91 | 468  |       |       | 812  |

| Day |   |   |   |      | Day |      |   |   |     |
|-----|---|---|---|------|-----|------|---|---|-----|
| 1   | 2 | 3 | 4 | 5    | 1   | 2    | 3 | 4 | 5   |
| P45 |   |   |   | 1578 | P92 | 1484 |   |   | 435 |
| P46 |   |   |   | 2518 | P93 | 1233 |   |   | 180 |
| P47 |   |   |   | 1690 |     |      |   |   |     |

**Table S4.** Changeover cost according to changeover duration for cases of the KRI-KRI facility.

| Changeover type | Changeover cost (€) |
|-----------------|---------------------|
| 0.00            | 750                 |
| 0.25            | 1125                |
| 0.50            | 1800                |
| 0.75            | 2250                |
| 1.00            | 6000                |
| 1.50            | 15000               |
| 2.00            | 22500               |

**Table S5.** Changeover times data for cases of the KRI-KRI facility.

| Line | Family | Family |      |      |      |      |      |      |      |      |      |      |      |      |      |      |      |      |      |      |      |      |      |      |
|------|--------|--------|------|------|------|------|------|------|------|------|------|------|------|------|------|------|------|------|------|------|------|------|------|------|
|      |        | F01    | F02  | F03  | F04  | F05  | F06  | F07  | F08  | F09  | F10  | F11  | F12  | F13  | F14  | F15  | F16  | F17  | F18  | F19  | F20  | F21  | F22  | F23  |
| J3   | F01    | 0.00   | 0.00 | 0.00 | 0.50 | 0.50 | 0.50 | 0.50 | 1.00 | 1.50 | 1.50 | -    | -    | -    | -    | -    | -    | -    | -    | -    | -    | -    | -    | -    |
| J3   | F02    | - *    | 0.00 | 0.00 | 0.50 | 0.50 | 0.50 | 0.50 | 1.00 | 1.50 | 1.50 | -    | -    | -    | -    | -    | -    | -    | -    | -    | -    | -    | -    | -    |
| J3   | F03    | -      | -    | 0.00 | 0.50 | 0.50 | 0.50 | 0.50 | 1.00 | 1.50 | 1.50 | -    | -    | -    | -    | -    | -    | -    | -    | -    | -    | -    | -    | -    |
| J3   | F04    | -      | -    | -    | 0.00 | -    | 1.00 | 1.50 | 0.50 | 0.75 | 0.75 | -    | -    | -    | -    | -    | -    | -    | -    | -    | -    | -    | -    | -    |
| J3   | F05    | -      | -    | -    | 0.25 | 0.00 | 0.50 | 0.75 | 1.00 | 1.50 | 1.50 | -    | -    | -    | -    | -    | -    | -    | -    | -    | -    | -    | -    | -    |
| J3   | F06    | -      | -    | -    | -    | -    | 0.00 | 0.50 | -    | -    | -    | -    | -    | -    | -    | -    | -    | -    | -    | -    | -    | -    | -    | -    |
| J4   | F06    | -      | -    | -    | -    | -    | 0.00 | -    | -    | -    | -    | -    | -    | -    | -    | -    | -    | -    | -    | -    | -    | -    | -    | 2.00 |
| J3   | F07    | -      | -    | -    | -    | -    | -    | 0.00 | -    | -    | -    | -    | -    | -    | -    | -    | -    | -    | -    | -    | -    | -    | -    | -    |
| J3   | F08    | -      | -    | -    | -    | -    | 2.00 | 2.00 | 0.00 | 0.50 | 0.50 | -    | -    | -    | -    | -    | -    | -    | -    | -    | -    | -    | -    | -    |
| J4   | F08    | -      | -    | -    | -    | -    | 2.00 | -    | 0.00 | 0.50 | 0.50 | -    | -    | -    | -    | -    | -    | -    | -    | -    | -    | -    | -    | 2.00 |
| J3   | F09    | -      | -    | -    | -    | -    | 2.00 | 2.00 | -    | 0.00 | 0.50 | -    | -    | -    | -    | -    | -    | -    | -    | -    | -    | -    | -    | -    |
| J4   | F09    | -      | -    | -    | -    | -    | 2.00 | -    | -    | 0.00 | 0.50 | -    | -    | -    | -    | -    | -    | -    | -    | -    | -    | -    | -    | 2.00 |
| J3   | F10    | -      | -    | -    | -    | -    | 2.00 | 2.00 | -    | -    | 0.00 | -    | -    | -    | -    | -    | -    | -    | -    | -    | -    | -    | -    | -    |
| J4   | F10    | -      | -    | -    | -    | -    | 2.00 | -    | -    | -    | 0.00 | -    | -    | -    | -    | -    | -    | -    | -    | -    | -    | -    | -    | 2.00 |
| J2   | F11    | -      | -    | -    | -    | -    | -    | -    | -    | -    | -    | 0.00 | -    | 1.00 | 1.00 | 1.50 | 2.00 | 2.00 | 1.00 | 1.00 | -    | -    | -    | -    |
| J2   | F12    | -      | -    | -    | -    | -    | -    | -    | -    | -    | -    | 0.50 | 0.00 | 0.50 | 0.50 | 1.00 | 2.00 | 2.00 | 0.50 | 0.50 | -    | -    | -    | -    |
| J2   | F13    | -      | -    | -    | -    | -    | -    | -    | -    | -    | -    | -    | -    | 0.00 | 0.50 | 1.00 | 2.00 | 2.00 | -    | -    | -    | -    | -    | -    |
| J2   | F14    | -      | -    | -    | -    | -    | -    | -    | -    | -    | -    | -    | -    | -    | 0.00 | 0.50 | 2.00 | 2.00 | -    | -    | -    | -    | -    | -    |
| J2   | F15    | -      | -    | -    | -    | -    | -    | -    | -    | -    | -    | -    | -    | -    | -    | 0.00 | 1.50 | 2.00 | -    | -    | -    | -    | -    | -    |
| J2   | F16    | -      | -    | -    | -    | -    | -    | -    | -    | -    | -    | -    | -    | -    | -    | -    | 0.00 | 0.50 | -    | -    | -    | -    | -    | -    |
| J2   | F17    | -      | -    | -    | -    | -    | -    | -    | -    | -    | -    | -    | -    | -    | -    | -    | -    | 0.00 | -    | -    | -    | -    | -    | -    |
| J2   | F18    | -      | -    | -    | -    | -    | -    | -    | -    | -    | -    | -    | -    | 0.50 | 0.50 | 1.00 | 2.00 | 2.00 | 0.00 | -    | -    | -    | -    | -    |
| J2   | F19    | -      | -    | -    | -    | -    | -    | -    | -    | -    | -    | -    | -    | 0.50 | 0.50 | 1.00 | 2.00 | 2.00 | 0.50 | 0.00 | -    | -    | -    | -    |
| J1   | F20    | -      | -    | -    | -    | -    | -    | -    | -    | -    | -    | -    | -    | -    | -    | -    | -    | -    | -    | -    | 0.00 | 0.50 | 1.00 | -    |
| J1   | F21    | -      | -    | -    | -    | -    | -    | -    | -    | -    | -    | -    | -    | -    | -    | -    | -    | -    | -    | -    | -    | 0.00 | 0.50 | -    |
| J1   | F22    | -      | -    | -    | -    | -    | -    | -    | -    | -    | -    | -    | -    | -    | -    | -    | -    | -    | -    | -    | -    | -    | 0.00 | -    |
| J4   | F23    | -      | -    | -    | -    | -    | -    | -    | -    | -    | -    | -    | -    | -    | -    | -    | -    | -    | -    | -    | -    | -    | -    | 0.00 |

\* (-) impossible changeover

## 2. TYRAS facility data

Tables S6-S9 contain data concerning the TYRAS facility and case studies B. In Table S6 there is a description of the annotations used to refer to the problem's basic elements. Information about products characteristics, production restrictions and storage costs is available at Table S7. It is noted that J8 represents the additional packing line considered in plant capacity expansion cases and is identical to J2. In Table S8 the studied product demand is depicted. Finally, Table S9 provides information regarding families changeover times.

**Table S6.** Annotations used for cases of the TYRAS facility.

|                            |                 |
|----------------------------|-----------------|
| Products                   | <b>P01-P176</b> |
| Recipes                    | <b>R01-R16</b>  |
| Families                   | <b>F01-F41</b>  |
| Packing lines              | <b>J1-J8</b>    |
| Scheduling horizon in days | <b>1-7</b>      |

**Table S7.** Product characteristics for cases of the TYRAS facility.

| Product | Weight (kg) | Family | Recipe | Line        | Packing rate (kg/h) |
|---------|-------------|--------|--------|-------------|---------------------|
| P01     | 0.15        | F01    | R01    | J1/J2/J3/J8 | 900/900/1080/900    |
| P02     | 0.17        | F01    | R01    | J1/J2/J3/J8 | 1020/1020/1224/1020 |
| P03     | 0.15        | F01    | R01    | J1/J2/J3/J8 | 900/900/1080/900    |
| P04     | 0.15        | F01    | R01    | J1/J2/J3/J8 | 900/900/1080/900    |
| P05     | 0.40        | F01    | R01    | J1/J2/J3/J8 | 2400/2400/2880/2400 |
| P06     | 0.15        | F01    | R01    | J1/J2/J3/J8 | 900/900/1080/900    |
| P07     | 0.15        | F01    | R01    | J1/J2/J3/J8 | 900/900/1080/900    |
| P08     | 0.60        | F01    | R01    | J1/J2/J3/J8 | 1200/1200/1440/1200 |
| P09     | 0.15        | F01    | R01    | J1/J2/J3/J8 | 900/900/1080/900    |
| P10     | 0.15        | F01    | R01    | J1/J2/J3/J8 | 900/900/1080/900    |
| P11     | 0.15        | F01    | R01    | J1/J2/J3/J8 | 900/900/1080/900    |
| P12     | 0.50        | F01    | R01    | J1/J2/J3/J8 | 3000/3000/3600/3000 |
| P13     | 0.30        | F01    | R01    | J1/J2/J3/J8 | 900/900/1080/900    |
| P14     | 0.40        | F01    | R01    | J1/J2/J3/J8 | 2400/2400/2880/2400 |
| P15     | 0.30        | F01    | R01    | J1/J2/J3/J8 | 900/900/1080/900    |
| P16     | 0.15        | F01    | R01    | J1/J2/J3/J8 | 900/900/1080/900    |
| P17     | 0.15        | F01    | R01    | J1/J2/J3/J8 | 900/900/1080/900    |
| P18     | 0.40        | F01    | R01    | J1/J2/J3/J8 | 2400/2400/2880/2400 |
| P19     | 0.51        | F01    | R01    | J1/J2/J3/J8 | 1020/1020/1224/1020 |
| P20     | 0.40        | F01    | R01    | J1/J2/J3/J8 | 2400/2400/2880/2400 |
| P21     | 1.00        | F02    | R01    | J4          | 2160                |
| P22     | 1.00        | F02    | R01    | J4          | 2160                |
| P23     | 1.00        | F02    | R01    | J4          | 2160                |
| P24     | 1.00        | F02    | R01    | J4          | 2160                |
| P25     | 0.15        | F03    | R01    | J1/J2/J3/J8 | 900/900/1080/900    |
| P26     | 0.15        | F03    | R01    | J1/J2/J3/J8 | 900/900/1080/900    |

Table S7. (Continued)

| Product | Weight (kg) | Family | Recipe | Line        | Packing rate (kg/h) |
|---------|-------------|--------|--------|-------------|---------------------|
| P27     | 0.15        | F03    | R01    | J1/J2/J3/J8 | 900/900/1080/900    |
| P28     | 0.15        | F03    | R01    | J1/J2/J3/J8 | 900/900/1080/900    |
| P29     | 0.15        | F03    | R01    | J1/J2/J3/J8 | 900/900/1080/900    |
| P30     | 0.15        | F03    | R01    | J1/J2/J3/J8 | 900/900/1080/900    |
| P31     | 0.17        | F03    | R01    | J1/J2/J3/J8 | 1020/1020/1224/1020 |
| P32     | 0.15        | F04    | R01    | J1/J2/J3/J8 | 900/900/1080/900    |
| P33     | 0.15        | F04    | R01    | J1/J2/J3/J8 | 900/900/1080/900    |
| P34     | 0.15        | F04    | R01    | J1/J2/J3/J8 | 900/900/1080/900    |
| P35     | 0.17        | F04    | R01    | J1/J2/J3/J8 | 1020/1020/1224/1020 |
| P36     | 0.15        | F04    | R01    | J1/J2/J3/J8 | 900/900/1080/900    |
| P37     | 0.15        | F04    | R01    | J1/J2/J3/J8 | 900/900/1080/900    |
| P38     | 0.15        | F04    | R01    | J1/J2/J3/J8 | 900/900/1080/900    |
| P39     | 0.15        | F04    | R01    | J1/J2/J3/J8 | 900/900/1080/900    |
| P40     | 0.15        | F05    | R01    | J1/J2/J3/J8 | 900/900/1080/900    |
| P41     | 0.15        | F05    | R01    | J1/J2/J3/J8 | 900/900/1080/900    |
| P42     | 0.15        | F05    | R01    | J1/J2/J3/J8 | 900/900/1080/900    |
| P43     | 0.17        | F05    | R01    | J1/J2/J3/J8 | 1020/1020/1224/1020 |
| P44     | 0.15        | F05    | R01    | J1/J2/J3/J8 | 900/900/1080/900    |
| P45     | 0.15        | F05    | R01    | J1/J2/J3/J8 | 900/900/1080/900    |
| P46     | 0.15        | F05    | R01    | J1/J2/J3/J8 | 900/900/1080/900    |
| P47     | 0.15        | F05    | R01    | J1/J2/J3/J8 | 900/900/1080/900    |
| P48     | 0.15        | F06    | R01    | J1/J2/J3/J8 | 900/900/1080/900    |
| P49     | 0.15        | F06    | R01    | J1/J2/J3/J8 | 900/900/1080/900    |
| P50     | 0.15        | F06    | R01    | J1/J2/J3/J8 | 900/900/1080/900    |
| P51     | 0.15        | F06    | R01    | J1/J2/J3/J8 | 900/900/1080/900    |
| P52     | 0.15        | F06    | R01    | J1/J2/J3/J8 | 900/900/1080/900    |
| P53     | 0.17        | F06    | R01    | J1/J2/J3/J8 | 1020/1020/1224/1020 |
| P54     | 0.15        | F07    | R01    | J1/J2/J3/J8 | 900/900/1080/900    |
| P55     | 0.15        | F07    | R01    | J1/J2/J3/J8 | 900/900/1080/900    |
| P56     | 0.15        | F07    | R01    | J1/J2/J3/J8 | 900/900/1080/900    |
| P57     | 0.15        | F07    | R01    | J1/J2/J3/J8 | 900/900/1080/900    |
| P58     | 0.17        | F07    | R01    | J1/J2/J3/J8 | 1020/1020/1224/1020 |
| P59     | 0.70        | F08    | R01    | J1/J2/J3/J8 | 1020/1020/1224/1020 |
| P60     | 0.15        | F08    | R01    | J1/J2/J3/J8 | 900/900/1080/900    |
| P61     | 0.15        | F08    | R01    | J1/J2/J3/J8 | 900/900/1080/900    |
| P62     | 0.15        | F08    | R01    | J1/J2/J3/J8 | 900/900/1080/900    |
| P63     | 0.15        | F09    | R01    | J1/J2/J3/J8 | 900/900/1080/900    |
| P64     | 0.15        | F09    | R01    | J1/J2/J3/J8 | 900/900/1080/900    |
| P65     | 0.15        | F09    | R01    | J1/J2/J3/J8 | 900/900/1080/900    |
| P66     | 0.15        | F10    | R01    | J2/J8       | 900                 |
| P67     | 0.15        | F10    | R01    | J2/J8       | 900                 |
| P68     | 0.15        | F10    | R01    | J2/J8       | 900                 |



**Table S7.** *(Continued)*

| <b>Product</b> | <b>Weight (kg)</b> | <b>Family</b> | <b>Recipe</b> | <b>Line</b> | <b>Packing rate (kg/h)</b> |
|----------------|--------------------|---------------|---------------|-------------|----------------------------|
| P69            | 0.17               | F11           | R01           | J1/J2/J3/J8 | 1020/1020/1224/1020        |
| P70            | 1.00               | F12           | R02           | J6          | 2700                       |
| P71            | 1.00               | F12           | R02           | J6          | 2700                       |
| P72            | 0.50               | F12           | R02           | J6          | 1350                       |
| P73            | 1.00               | F13           | R02           | J4          | 2160                       |
| P74            | 1.00               | F13           | R02           | J4          | 2160                       |
| P75            | 0.60               | F14           | R02           | J1/J2/J3/J8 | 1200                       |
| P76            | 0.60               | F14           | R02           | J1/J2/J3/J8 | 1200/1200/1440/1200        |
| P77            | 0.15               | F14           | R02           | J1/J2/J3/J8 | 900/900/1080/900           |
| P78            | 0.15               | F14           | R02           | J1/J2/J3/J8 | 900/900/1080/900           |
| P79            | 0.20               | F14           | R02           | J1/J2/J3/J8 | 1200/1200/1440/1200        |
| P80            | 0.51               | F14           | R02           | J1/J2/J3/J8 | 1020/1020/1224/1020        |
| P81            | 0.30               | F14           | R02           | J1/J2/J3/J8 | 900/900/1080/900           |
| P82            | 0.60               | F14           | R02           | J1/J2/J3/J8 | 1200/1200/1440/1200        |
| P83            | 0.60               | F14           | R02           | J1/J2/J3/J8 | 1200/1200/1440/1200        |
| P84            | 0.15               | F15           | R02           | J2/J8       | 900                        |
| P85            | 1.00               | F16           | R03           | J6          | 2700                       |
| P86            | 0.50               | F16           | R03           | J6          | 1350                       |
| P87            | 0.60               | F17           | R03           | J1/J2/J3/J8 | 1200/1200/1440/1200        |
| P88            | 0.15               | F17           | R03           | J1/J2/J3/J8 | 900/900/1080/900           |
| P89            | 0.17               | F17           | R03           | J1/J2/J3/J8 | 1020/1020/1224/1020        |
| P90            | 0.60               | F17           | R03           | J1/J2/J3/J8 | 1200/1200/1440/1200        |
| P91            | 0.51               | F17           | R03           | J1/J2/J3/J8 | 1020/1020/1224/1020        |
| P92            | 0.60               | F17           | R03           | J1/J2/J3/J8 | 1200/1200/1440/1200        |
| P93            | 5.00               | F18           | R03           | J5          | 1575                       |
| P94            | 0.30               | F19           | R04           | J1/J2/J3/J8 | 900/900/1080/900           |
| P95            | 0.60               | F19           | R04           | J1/J2/J3/J8 | 1200/1200/1440/1200        |
| P96            | 0.40               | F19           | R04           | J1/J2/J3/J8 | 800/800/2880/800           |
| P97            | 0.40               | F19           | R04           | J1/J2/J3/J8 | 2400/2400/2880/2400        |
| P98            | 0.40               | F19           | R04           | J1/J2/J3/J8 | 2400/2400/2880/2400        |
| P99            | 0.15               | F19           | R04           | J1/J2/J3/J8 | 900/900/1080/900           |
| P100           | 0.15               | F19           | R04           | J1/J2/J3/J8 | 900/900/1080/900           |
| P101           | 0.15               | F19           | R04           | J1/J2/J3/J8 | 900/900/1080/900           |
| P102           | 0.15               | F19           | R04           | J1/J2/J3/J8 | 900/900/1080/900           |
| P103           | 0.15               | F19           | R04           | J1/J2/J3/J8 | 900/900/1080/900           |
| P104           | 0.50               | F19           | R04           | J1/J2/J3/J8 | 3000/3000/3600/3000        |
| P105           | 0.20               | F19           | R04           | J1/J2/J3/J8 | 1200/1200/1440/1200        |
| P106           | 0.45               | F19           | R04           | J1/J2/J3/J8 | 2700/2700/3240/2700        |
| P107           | 0.50               | F19           | R04           | J1/J2/J3/J8 | 3000/3000/3600/3000        |
| P108           | 1.00               | F20           | R04           | J4          | 2160                       |
| P109           | 1.00               | F20           | R04           | J4          | 2160                       |
| P110           | 1.00               | F20           | R04           | J4          | 2160                       |

Table S7. (Continued)

| Product | Weight (kg) | Family | Recipe | Line        | Packing rate (kg/h) |
|---------|-------------|--------|--------|-------------|---------------------|
| P111    | 1.00        | F20    | R04    | J4          | 2160                |
| P112    | 1.00        | F20    | R04    | J4          | 2160                |
| P113    | 1.00        | F20    | R04    | J4          | 2160                |
| P114    | 5.00        | F21    | R04    | J5          | 1575                |
| P115    | 5.00        | F21    | R04    | J5          | 1575                |
| P116    | 5.00        | F21    | R04    | J5          | 1575                |
| P117    | 1.00        | F22    | R05    | J4          | 2160                |
| P118    | 1.00        | F22    | R05    | J4          | 2160                |
| P119    | 1.00        | F22    | R05    | J4          | 2160                |
| P120    | 5.00        | F23    | R05    | J5          | 1575                |
| P121    | 0.15        | F24    | R05    | J1/J2/J3/J8 | 900/900/1080/900    |
| P122    | 0.20        | F25    | R06    | J1/J2/J8    | 1200                |
| P123    | 0.40        | F25    | R06    | J1/J2/J8    | 1200                |
| P124    | 0.20        | F25    | R06    | J1/J2/J8    | 1200                |
| P125    | 0.15        | F25    | R06    | J1/J2/J8    | 900                 |
| P126    | 0.20        | F25    | R06    | J1/J2/J8    | 1200                |
| P127    | 0.15        | F25    | R06    | J1/J2/J8    | 900                 |
| P128    | 0.20        | F25    | R06    | J1/J2/J8    | 1200                |
| P129    | 0.20        | F25    | R06    | J1/J2/J8    | 1200                |
| P130    | 0.34        | F26    | R07    | J1/J2/J3/J8 | 1020                |
| P131    | 0.34        | F26    | R07    | J1/J2/J3/J8 | 1020                |
| P132    | 0.29        | F27    | R08    | J7          | 724                 |
| P133    | 0.29        | F28    | R08    | J7          | 724                 |
| P134    | 0.29        | F29    | R08    | J7          | 724                 |
| P135    | 0.29        | F30    | R08    | J7          | 724                 |
| P136    | 0.30        | F31    | R09    | J7          | 900                 |
| P137    | 0.30        | F32    | R10    | J1/J2/J3/J8 | 900/900/2160/900    |
| P138    | 0.30        | F32    | R10    | J1/J2/J3/J8 | 900/900/2160/900    |
| P139    | 0.15        | F32    | R10    | J1/J2/J3/J8 | 900/900/1080/900    |
| P140    | 0.15        | F32    | R10    | J1/J2/J3/J8 | 900/900/1080/900    |
| P141    | 0.30        | F33    | R10    | J1/J2/J3/J8 | 900/900/1080/900    |
| P142    | 0.30        | F33    | R10    | J1/J2/J3/J8 | 900/900/1080/900    |
| P143    | 0.45        | F33    | R10    | J1/J2/J3/J8 | 900/900/1080/900    |
| P144    | 0.15        | F33    | R10    | J1/J2/J3/J8 | 900/900/1080/900    |
| P145    | 0.15        | F33    | R10    | J1/J2/J3/J8 | 900/900/1080/900    |
| P146    | 0.30        | F34    | R10    | J1/J2/J3/J8 | 900/900/1080/900    |
| P147    | 0.30        | F34    | R10    | J1/J2/J3/J8 | 900/900/1080/900    |
| P148    | 0.15        | F34    | R10    | J1/J2/J3/J8 | 900/900/1080/900    |
| P149    | 0.30        | F35    | R10    | J1/J2/J3/J8 | 900/900/1080/900    |
| P150    | 0.30        | F35    | R10    | J1/J2/J3/J8 | 900/900/1080/900    |
| P151    | 0.45        | F35    | R10    | J1/J2/J3/J8 | 900/900/1080/900    |
| P152    | 0.15        | F35    | R10    | J1/J2/J3/J8 | 900/900/1080/900    |

**Table S7.** (Continued)

| Product | Weight (kg) | Family | Recipe | Line        | Packing rate (kg/h) |
|---------|-------------|--------|--------|-------------|---------------------|
| P153    | 0.15        | F36    | R11    | J1/J2/J3/J8 | 900/900/1080/900    |
| P154    | 0.34        | F36    | R11    | J1/J2/J3/J8 | 1020/1020/1224/1020 |
| P155    | 0.34        | F36    | R11    | J1/J2/J3/J8 | 1020/1020/2448/1020 |
| P156    | 0.40        | F37    | R12    | J1/J2/J8    | 1200                |
| P157    | 0.20        | F37    | R12    | J1/J2/J8    | 1200                |
| P158    | 0.30        | F37    | R12    | J1/J2/J8    | 900                 |
| P159    | 0.51        | F38    | R13    | J1/J2/J3/J8 | 1020/1020/1224/1020 |
| P160    | 0.17        | F38    | R13    | J1/J2/J3/J8 | 1020/1020/1224/1020 |
| P161    | 0.15        | F38    | R13    | J1/J2/J3/J8 | 900/900/1080/900    |
| P162    | 0.51        | F38    | R13    | J1/J2/J3/J8 | 1020/1020/1224/1020 |
| P163    | 0.15        | F39    | R14    | J1/J2/J3/J8 | 900/900/1080/900    |
| P164    | 0.15        | F39    | R14    | J1/J2/J3/J8 | 900/900/1080/900    |
| P165    | 0.15        | F39    | R14    | J1/J2/J3/J8 | 900/900/1080/900    |
| P166    | 0.15        | F39    | R14    | J1/J2/J3/J8 | 900/900/1080/900    |
| P167    | 0.15        | F39    | R14    | J1/J2/J3/J8 | 900/900/1080/900    |
| P168    | 0.15        | F39    | R14    | J1/J2/J3/J8 | 900/900/1080/900    |
| P169    | 0.51        | F39    | R14    | J1/J2/J3/J8 | 1020/1020/1224/1020 |
| P170    | 0.34        | F39    | R14    | J1/J2/J3/J8 | 1020/1020/1224/1020 |
| P171    | 0.15        | F39    | R14    | J1/J2/J3/J8 | 900/900/1080/900    |
| P172    | 0.15        | F39    | R14    | J1/J2/J3/J8 | 900/900/1080/900    |
| P173    | 0.34        | F39    | R14    | J1/J2/J3/J8 | 2040/2040/1224/2040 |
| P174    | 0.20        | F40    | R15    | J1/J2/J8    | 1200                |
| P175    | 0.51        | F41    | R16    | J1/J2/J8    | 1020                |
| P176    | 0.51        | F41    | R16    | J1/J2/J8    | 1020                |

**Table S8.** Product demand for cases of the TYRAS facility.

|     | Day |      |     |      |      |      |      |
|-----|-----|------|-----|------|------|------|------|
|     | 1   | 2    | 3   | 4    | 5    | 6    | 7    |
| P01 |     | 6263 |     |      |      |      | 241  |
| P02 |     |      |     |      |      |      |      |
| P03 |     |      |     |      |      |      |      |
| P04 | 512 |      |     |      |      |      |      |
| P05 |     |      |     | 253  |      | 3257 |      |
| P06 |     |      | 449 |      |      |      |      |
| P07 |     |      | 428 |      |      |      |      |
| P08 |     |      |     | 3315 |      |      |      |
| P09 |     |      | 448 |      |      |      |      |
| P10 |     |      |     |      |      |      | 1351 |
| P11 |     |      | 395 |      |      |      | 2135 |
| P12 |     | 2053 |     |      |      |      |      |
| P13 |     |      |     |      | 1281 |      |      |

**Table S8.** *(Continued)*

|     | Day  |      |      |      |      |     |      |
|-----|------|------|------|------|------|-----|------|
|     | 1    | 2    | 3    | 4    | 5    | 6   | 7    |
| P14 |      |      |      |      |      |     |      |
| P15 |      |      |      |      | 601  |     |      |
| P16 |      |      |      |      |      |     |      |
| P17 |      |      | 553  |      |      |     |      |
| P18 |      |      |      |      |      |     |      |
| P19 |      |      |      |      |      | 487 |      |
| P20 |      |      |      |      |      |     |      |
| P21 |      | 421  |      |      |      |     |      |
| P22 |      | 655  |      |      |      |     |      |
| P23 |      | 4155 |      |      |      |     |      |
| P24 | 1427 |      |      | 4728 |      |     |      |
| P25 |      |      |      |      |      |     |      |
| P26 |      |      |      | 405  | 497  |     |      |
| P27 |      |      |      |      |      |     |      |
| P28 | 1031 |      |      |      |      |     | 211  |
| P29 |      |      |      |      |      |     | 3055 |
| P30 |      |      |      |      |      |     | 244  |
| P31 |      |      | 3175 |      |      |     |      |
| P32 |      |      |      |      |      |     |      |
| P33 |      |      |      |      |      |     | 435  |
| P34 |      |      |      |      |      | 642 | 650  |
| P35 |      |      |      |      |      |     | 1611 |
| P36 |      |      |      | 389  |      |     |      |
| P37 |      |      |      |      |      |     |      |
| P38 | 1057 |      |      |      |      |     | 1623 |
| P39 |      |      |      |      |      |     |      |
| P40 |      |      |      |      |      |     |      |
| P41 |      |      |      |      |      |     | 802  |
| P42 |      |      |      | 437  |      |     |      |
| P43 |      |      |      | 2760 |      |     |      |
| P44 |      |      |      |      |      |     | 5108 |
| P45 |      |      |      |      |      |     |      |
| P46 |      |      |      | 282  |      |     |      |
| P47 |      |      |      | 451  |      |     |      |
| P48 | 4572 |      |      |      |      |     |      |
| P49 | 5080 |      |      |      |      |     |      |
| P50 |      |      |      | 432  |      |     |      |
| P51 |      |      |      |      |      |     |      |
| P52 |      |      |      |      | 467  |     |      |
| P53 | 1871 |      |      |      | 2704 |     |      |
| P54 |      |      |      |      |      |     |      |

**Table S8.** *(Continued)*

|     | Day  |     |       |       |       |       |       |
|-----|------|-----|-------|-------|-------|-------|-------|
|     | 1    | 2   | 3     | 4     | 5     | 6     | 7     |
| P55 |      |     |       | 468   |       |       |       |
| P56 |      |     |       | 301   |       |       |       |
| P57 |      |     |       | 514   |       |       |       |
| P58 |      |     |       | 5724  |       |       |       |
| P59 |      |     |       |       | 13354 |       |       |
| P60 |      |     |       | 341   |       |       |       |
| P61 |      |     |       | 272   |       |       |       |
| P62 |      |     |       |       |       |       |       |
| P63 |      |     |       | 127   |       |       |       |
| P64 |      |     |       | 277   |       |       |       |
| P65 |      |     |       |       |       |       |       |
| P66 |      |     |       |       |       |       |       |
| P67 |      |     |       |       |       |       |       |
| P68 |      |     |       |       |       |       |       |
| P69 |      |     | 3175  | 2826  |       |       |       |
| P70 |      |     |       | 10183 |       |       |       |
| P71 |      |     |       |       |       |       |       |
| P72 |      |     |       |       |       |       |       |
| P73 |      | 619 |       |       |       |       |       |
| P74 | 9756 | 640 |       |       |       |       |       |
| P75 |      |     |       | 5455  |       | 21563 |       |
| P76 | 2765 |     |       |       |       |       |       |
| P77 |      |     |       |       |       |       |       |
| P78 |      | 380 |       |       |       |       |       |
| P79 |      | 160 |       |       |       |       |       |
| P80 |      |     |       |       |       |       |       |
| P81 |      |     |       |       | 338   |       |       |
| P82 |      |     |       | 3418  |       |       |       |
| P83 |      |     |       |       |       |       |       |
| P84 |      |     |       |       |       |       |       |
| P85 |      |     | 25722 |       |       |       |       |
| P86 |      |     | 670   |       |       |       |       |
| P87 |      |     |       |       | 4357  |       | 11251 |
| P88 |      |     |       |       |       | 12137 |       |
| P89 |      |     |       |       |       | 5103  |       |
| P90 |      |     |       |       |       |       |       |
| P91 |      |     |       |       | 345   |       |       |
| P92 |      |     |       |       |       |       |       |
| P93 |      |     | 2630  |       |       |       |       |
| P94 |      |     |       | 1859  | 435   |       |       |
| P95 |      |     | 1792  |       |       |       |       |

**Table S8.** *(Continued)*

|      | Day  |      |      |      |      |      |       |
|------|------|------|------|------|------|------|-------|
|      | 1    | 2    | 3    | 4    | 5    | 6    | 7     |
| P96  |      |      |      | 394  |      |      |       |
| P97  | 296  |      |      |      |      |      |       |
| P98  |      |      |      |      |      |      |       |
| P99  |      |      | 463  |      |      |      |       |
| P100 |      |      | 1821 |      |      |      |       |
| P101 |      |      | 500  |      |      |      |       |
| P102 |      |      |      |      |      |      |       |
| P103 |      |      | 69   |      |      |      |       |
| P104 |      |      |      |      |      |      |       |
| P105 |      |      | 490  |      |      |      |       |
| P106 |      |      |      |      |      |      |       |
| P107 |      |      |      |      |      |      |       |
| P108 |      |      |      |      |      |      |       |
| P109 |      |      | 1064 | 856  |      |      |       |
| P110 |      | 1766 |      |      |      |      |       |
| P111 | 3630 |      |      |      |      |      | 6785  |
| P112 | 638  | 429  | 719  |      |      |      |       |
| P113 | 6221 |      |      |      |      |      | 2555  |
| P114 |      |      |      |      |      |      |       |
| P115 |      |      |      | 329  |      |      |       |
| P116 |      |      |      | 701  |      |      |       |
| P117 |      | 6661 |      | 2762 |      |      |       |
| P118 |      | 847  |      |      |      |      |       |
| P119 |      | 1320 |      |      |      |      |       |
| P120 |      |      |      | 927  |      |      |       |
| P121 |      |      | 62   | 98   |      |      |       |
| P122 |      |      |      |      |      |      | 11050 |
| P123 |      |      |      |      | 5615 |      |       |
| P124 |      |      |      |      |      |      |       |
| P125 |      | 341  |      |      |      |      | 215   |
| P126 |      |      |      |      |      |      |       |
| P127 |      |      |      |      |      |      |       |
| P128 |      | 822  |      |      |      |      |       |
| P129 |      |      |      |      |      |      |       |
| P130 |      |      |      |      |      | 2444 |       |
| P131 |      |      |      |      |      |      |       |
| P132 |      |      |      | 2289 |      |      |       |
| P133 |      |      |      |      |      |      |       |
| P134 |      |      | 3236 |      |      |      |       |
| P135 |      |      |      | 328  |      |      |       |
| P136 |      |      |      |      | 531  | 179  |       |

**Table S8.** *(Continued)*

|      | Day |      |     |   |       |      |      |
|------|-----|------|-----|---|-------|------|------|
|      | 1   | 2    | 3   | 4 | 5     | 6    | 7    |
| P137 |     |      |     |   |       |      |      |
| P138 |     |      |     |   | 405   |      |      |
| P139 |     |      |     |   |       |      |      |
| P140 |     |      |     |   |       |      |      |
| P141 |     |      |     |   |       |      |      |
| P142 |     |      |     |   | 578   |      |      |
| P143 |     |      |     |   |       |      |      |
| P144 |     |      | 523 |   |       |      |      |
| P145 |     |      |     |   |       |      |      |
| P146 |     |      |     |   |       |      |      |
| P147 |     |      |     |   | 532   |      |      |
| P148 |     |      | 450 |   |       |      |      |
| P149 |     |      |     |   | 349   |      |      |
| P150 |     |      |     |   |       |      |      |
| P151 |     |      |     |   |       |      |      |
| P152 |     |      | 306 |   |       |      |      |
| P153 |     |      |     |   |       |      |      |
| P154 |     |      |     |   | 463   |      |      |
| P155 |     |      |     |   | 1027  |      |      |
| P156 |     | 3986 |     |   |       |      |      |
| P157 |     |      |     |   |       |      | 640  |
| P158 |     |      |     |   |       | 2642 |      |
| P159 |     |      |     |   |       |      |      |
| P160 |     |      |     |   |       | 1323 |      |
| P161 |     |      |     |   |       |      |      |
| P162 |     |      |     |   |       |      |      |
| P163 |     |      |     |   |       |      |      |
| P164 |     |      |     |   |       |      |      |
| P165 |     | 981  |     |   |       |      |      |
| P166 |     | 1042 |     |   |       |      |      |
| P167 |     |      |     |   |       |      |      |
| P168 |     | 325  |     |   |       |      |      |
| P169 |     | 5948 |     |   |       |      |      |
| P170 |     |      |     |   |       |      |      |
| P171 |     | 5384 |     |   | 10228 |      |      |
| P172 |     |      |     |   |       |      |      |
| P173 |     |      |     |   |       |      |      |
| P174 |     |      |     |   |       |      | 1417 |
| P175 |     |      |     |   |       |      |      |
| P176 |     | 2826 |     |   |       |      |      |

**Table S9.** Changeover times data for cases of the TYRAS facility.

| Line     | Family | Family |      |      |      |      |      |      |      |      |      |      |      |      |      |      |      |      |      |      |      |      |
|----------|--------|--------|------|------|------|------|------|------|------|------|------|------|------|------|------|------|------|------|------|------|------|------|
|          |        | F1     | F2   | F3   | F4   | F5   | F6   | F7   | F8   | F9   | F10  | F11  | F12  | F13  | F14  | F15  | F16  | F17  | F18  | F19  | F20  | F21  |
| J1/J2/J3 | F1     | 0.00   | 0.00 | 0.33 | 0.33 | 0.33 | 0.33 | 0.33 | 0.33 | 0.33 | 2.00 | 0.33 | 0.00 | 0.00 | 0.17 | 2.00 | 0.00 | 0.17 | 0.00 | 0.17 | 0.00 | 0.00 |
| J4       | F2     | 0.00   | 0.00 | 0.00 | 0.00 | 0.00 | 0.00 | 0.00 | 0.00 | 0.00 | 0.00 | 0.00 | 0.00 | 0.17 | 0.00 | 0.00 | 0.00 | 0.00 | 0.00 | 0.00 | 0.17 | 0.00 |
| J1/J2/J3 | F3     | 0.50   | 0.00 | 0.00 | 0.33 | 0.33 | 0.33 | 0.33 | 0.33 | 0.33 | 2.00 | 0.33 | 0.00 | 0.00 | 0.50 | 2.00 | 0.00 | 0.50 | 0.00 | 0.50 | 0.00 | 0.00 |
| J1/J2/J3 | F4     | 0.50   | 0.00 | - *  | 0.00 | 0.33 | 0.33 | 0.33 | 0.33 | 0.33 | 2.00 | 0.33 | 0.00 | 0.00 | 0.50 | 2.00 | 0.00 | 0.50 | 0.00 | 0.50 | 0.00 | 0.00 |
| J1/J2/J3 | F5     | 0.50   | 0.00 | -    | -    | 0.00 | 0.33 | 0.33 | 0.33 | 0.33 | 2.00 | 0.33 | 0.00 | 0.00 | 0.50 | 2.00 | 0.00 | 0.50 | 0.00 | 0.50 | 0.00 | 0.00 |
| J1/J2/J3 | F6     | 0.50   | 0.00 | -    | -    | -    | 0.00 | -    | 0.33 | -    | 2.00 | 0.33 | 0.00 | 0.00 | 0.50 | 2.00 | 0.00 | 0.50 | 0.00 | 0.50 | 0.00 | 0.00 |
| J1/J2/J3 | F7     | 0.50   | 0.00 | -    | -    | 0.33 | 0.33 | 0.00 | 0.33 | 0.33 | 2.00 | 0.33 | 0.00 | 0.00 | 0.50 | 2.00 | 0.00 | 0.50 | 0.00 | 0.50 | 0.00 | 0.00 |
| J1/J2/J3 | F8     | 0.50   | 0.00 | -    | -    | 0.33 | 0.33 | 0.33 | 0.00 | 0.33 | 2.00 | 0.33 | 0.00 | 0.00 | 0.50 | 2.00 | 0.00 | 0.50 | 0.00 | 0.50 | 0.00 | 0.00 |
| J1/J2/J3 | F9     | 0.50   | 0.00 | -    | -    | 0.33 | 0.33 | 0.33 | 0.33 | 0.00 | 2.00 | 0.33 | 0.00 | 0.00 | 0.50 | 2.00 | 0.00 | 0.50 | 0.00 | 0.50 | 0.00 | 0.00 |
| J2       | F10    | 2.00   | 0.00 | 2.00 | 2.00 | 2.00 | 2.00 | 2.00 | 2.00 | 2.00 | 0.00 | 2.00 | 0.00 | 0.00 | 2.00 | 0.17 | 2.00 | 2.00 | 2.00 | 2.00 | 0.00 | 0.00 |
| J2/J3    | F11    | 0.50   | 0.00 | 0.33 | 0.33 | 0.33 | 0.33 | 0.33 | 0.33 | 0.33 | 2.00 | 0.00 | 0.00 | 0.00 | 0.50 | 2.00 | 0.00 | 0.50 | 0.00 | 0.50 | 0.00 | 0.00 |
| J6       | F12    | 0.00   | 0.00 | 0.00 | 0.00 | 0.00 | 0.00 | 0.00 | 0.00 | 0.00 | 0.00 | 0.00 | 0.00 | 0.00 | 0.00 | 0.00 | 0.17 | 0.00 | 0.00 | 0.00 | 0.00 | 0.00 |
| J4       | F13    | 0.00   | 0.17 | 0.00 | 0.00 | 0.00 | 0.00 | 0.00 | 0.00 | 0.00 | 0.00 | 0.00 | 0.00 | 0.00 | 0.00 | 0.00 | 0.00 | 0.00 | 0.00 | 0.00 | 0.17 | 0.00 |
| J1/J2/J3 | F14    | 0.17   | 0.00 | 0.33 | 0.33 | 0.33 | 0.33 | 0.33 | 0.33 | 0.33 | 2.00 | 0.33 | 0.00 | 0.00 | 0.00 | 2.00 | 0.00 | 0.17 | 0.00 | 0.17 | 0.00 | 0.00 |
| J2       | F15    | 2.00   | 0.00 | 2.00 | 2.00 | 2.00 | 2.00 | 2.00 | 2.00 | 2.00 | 0.17 | 2.00 | 0.00 | 0.00 | 2.00 | 0.00 | 2.00 | 2.00 | 2.00 | 2.00 | 0.00 | 0.00 |
| J6       | F16    | 0.00   | 0.00 | 0.00 | 0.00 | 0.00 | 0.00 | 0.00 | 0.00 | 0.00 | 0.00 | 0.00 | 0.17 | 0.00 | 0.00 | 0.00 | 0.00 | 0.00 | 0.00 | 0.00 | 0.00 | 0.00 |
| J1/J2/J3 | F17    | 0.17   | 0.00 | 0.33 | 0.33 | 0.33 | 0.33 | 0.33 | 0.33 | 0.33 | 2.00 | 0.33 | 0.00 | 0.00 | 0.17 | 2.00 | 0.00 | 0.00 | 0.00 | 0.17 | 0.00 | 0.00 |
| J5       | F18    | 0.00   | 0.00 | 0.00 | 0.00 | 0.00 | 0.00 | 0.00 | 0.00 | 0.00 | 0.00 | 0.00 | 0.00 | 0.00 | 0.00 | 0.00 | 0.00 | 0.00 | 0.00 | 0.00 | 0.00 | 0.17 |
| J1/J2/J3 | F19    | 0.17   | 0.00 | 0.33 | 0.33 | 0.33 | 0.33 | 0.33 | 0.33 | 0.33 | 2.00 | 0.33 | 0.00 | 0.00 | 0.17 | 2.00 | 0.00 | 0.17 | 0.00 | 0.00 | 0.00 | 0.00 |
| J4       | F20    | 0.00   | 0.17 | 0.00 | 0.00 | 0.00 | 0.00 | 0.00 | 0.00 | 0.00 | 0.00 | 0.00 | 0.00 | 0.17 | 0.00 | 0.00 | 0.00 | 0.00 | 0.00 | 0.00 | 0.00 | 0.00 |
| J5       | F21    | 0.00   | 0.00 | 0.00 | 0.00 | 0.00 | 0.00 | 0.00 | 0.00 | 0.00 | 0.00 | 0.00 | 0.00 | 0.00 | 0.00 | 0.00 | 0.00 | 0.00 | 0.17 | 0.00 | 0.00 | 0.00 |

\* (-) impossible changeover



Table S9. (Continued)

| Line     | Family | Family |      |      |      |      |      |      |      |      |      |      |      |      |      |      |      |      |      |      |      |      |
|----------|--------|--------|------|------|------|------|------|------|------|------|------|------|------|------|------|------|------|------|------|------|------|------|
|          |        | F1     | F2   | F3   | F4   | F5   | F6   | F7   | F8   | F9   | F10  | F11  | F12  | F13  | F14  | F15  | F16  | F17  | F18  | F19  | F20  | F21  |
| J4       | F22    | 0.00   | 0.25 | 0.00 | 0.00 | 0.00 | 0.00 | 0.00 | 0.00 | 0.00 | 0.00 | 0.00 | 0.00 | 0.25 | 0.00 | 0.00 | 0.00 | 0.00 | 0.00 | 0.00 | 0.25 | 0.00 |
| J5       | F23    | 0.00   | 0.00 | 0.00 | 0.00 | 0.00 | 0.00 | 0.00 | 0.00 | 0.00 | 0.00 | 0.00 | 0.00 | 0.00 | 0.00 | 0.00 | 0.00 | 0.00 | 0.25 | 0.00 | 0.00 | 0.25 |
| J1/J2/J3 | F24    | 0.25   | 0.00 | 0.33 | 0.33 | 0.33 | 0.33 | 0.33 | 0.33 | 0.33 | 2.00 | 0.33 | 0.00 | 0.00 | 0.25 | 2.00 | 0.00 | 0.25 | 0.00 | 0.25 | 0.00 | 0.00 |
| J1/J2    | F25    | 0.25   | 0.00 | 0.33 | 0.33 | 0.33 | 0.33 | 0.33 | 0.33 | 0.33 | 2.00 | 0.33 | 0.00 | 0.00 | 0.25 | 2.00 | 0.00 | 0.25 | 0.00 | 0.25 | 0.00 | 0.00 |
| J1/J2/J3 | F26    | 0.25   | 0.00 | 0.33 | 0.33 | 0.33 | 0.33 | 0.33 | 0.33 | 0.33 | 2.00 | 0.33 | 0.00 | 0.00 | 0.25 | 2.00 | 0.00 | 0.25 | 0.00 | 0.25 | 0.00 | 0.00 |
| J7       | F27    | 0.00   | 0.00 | 0.00 | 0.00 | 0.00 | 0.00 | 0.00 | 0.00 | 0.00 | 0.00 | 0.00 | 0.00 | 0.00 | 0.00 | 0.00 | 0.00 | 0.00 | 0.00 | 0.00 | 0.00 | 0.00 |
| J7       | F28    | 0.00   | 0.00 | 0.00 | 0.00 | 0.00 | 0.00 | 0.00 | 0.00 | 0.00 | 0.00 | 0.00 | 0.00 | 0.00 | 0.00 | 0.00 | 0.00 | 0.00 | 0.00 | 0.00 | 0.00 | 0.00 |
| J7       | F29    | 0.00   | 0.00 | 0.00 | 0.00 | 0.00 | 0.00 | 0.00 | 0.00 | 0.00 | 0.00 | 0.00 | 0.00 | 0.00 | 0.00 | 0.00 | 0.00 | 0.00 | 0.00 | 0.00 | 0.00 | 0.00 |
| J7       | F30    | 0.00   | 0.00 | 0.00 | 0.00 | 0.00 | 0.00 | 0.00 | 0.00 | 0.00 | 0.00 | 0.00 | 0.00 | 0.00 | 0.00 | 0.00 | 0.00 | 0.00 | 0.00 | 0.00 | 0.00 | 0.00 |
| J7       | F31    | 0.00   | 0.00 | 0.00 | 0.00 | 0.00 | 0.00 | 0.00 | 0.00 | 0.00 | 0.00 | 0.00 | 0.00 | 0.00 | 0.00 | 0.00 | 0.00 | 0.00 | 0.00 | 0.00 | 0.00 | 0.00 |
| J1/J2/J3 | F32    | 0.25   | 0.00 | 0.33 | 0.33 | 0.33 | 0.33 | 0.33 | 0.33 | 0.33 | 2.00 | 0.33 | 0.00 | 0.00 | 0.25 | 2.00 | 0.00 | 0.25 | 0.00 | 0.25 | 0.00 | 0.00 |
| J1/J2/J3 | F33    | 0.50   | 0.00 | 0.50 | 0.50 | 0.50 | 0.50 | 0.50 | 0.50 | 0.50 | 2.00 | 0.50 | 0.00 | 0.00 | 0.50 | 2.00 | 0.00 | 0.50 | 0.00 | 0.50 | 0.00 | 0.00 |
| J1/J2/J3 | F34    | 0.50   | 0.00 | 0.50 | 0.50 | 0.50 | 0.50 | 0.50 | 0.50 | 0.50 | 2.00 | 0.50 | 0.00 | 0.00 | 0.50 | 2.00 | 0.00 | 0.50 | 0.00 | 0.50 | 0.00 | 0.00 |
| J1/J2/J3 | F35    | - *    | -    | -    | -    | -    | -    | -    | -    | -    | -    | -    | -    | -    | -    | -    | -    | -    | -    | -    | -    | -    |
| J1/J2/J3 | F36    | 0.25   | 0.00 | 0.33 | 0.33 | 0.33 | 0.33 | 0.33 | 0.33 | 0.33 | 2.00 | 0.33 | 0.00 | 0.00 | 0.25 | 2.00 | 0.00 | 0.25 | 0.00 | 0.25 | 0.00 | 0.00 |
| J1/J2    | F37    | 0.25   | 0.00 | 0.33 | 0.33 | 0.33 | 0.33 | 0.33 | 0.33 | 0.33 | 2.00 | 0.33 | 0.00 | 0.00 | 0.25 | 2.00 | 0.00 | 0.25 | 0.00 | 0.25 | 0.00 | 0.00 |
| J1/J2/J3 | F38    | 0.25   | 0.00 | 0.33 | 0.33 | 0.33 | 0.33 | 0.33 | 0.33 | 0.33 | 2.00 | 0.33 | 0.00 | 0.00 | 0.25 | 2.00 | 0.00 | 0.25 | 0.00 | 0.25 | 0.00 | 0.00 |
| J1/J2/J3 | F39    | 0.25   | 0.00 | 0.33 | 0.33 | 0.33 | 0.33 | 0.33 | 0.33 | 0.33 | 2.00 | 0.33 | 0.00 | 0.00 | 0.25 | 2.00 | 0.00 | 0.25 | 0.00 | 0.25 | 0.00 | 0.00 |
| J1/J2    | F40    | 0.25   | 0.00 | 0.33 | 0.33 | 0.33 | 0.33 | 0.33 | 0.33 | 0.33 | 2.00 | 0.33 | 0.00 | 0.00 | 0.25 | 2.00 | 0.00 | 0.25 | 0.00 | 0.25 | 0.00 | 0.00 |
| J1/J2    | F41    | 0.25   | 0.00 | 0.33 | 0.33 | 0.33 | 0.33 | 0.33 | 0.33 | 0.33 | 2.00 | 0.33 | 0.00 | 0.00 | 0.25 | 2.00 | 0.00 | 0.25 | 0.00 | 0.25 | 0.00 | 0.00 |

\* (-) impossible changeover

Table S9. (Continued)

| Line     | Family | Family |      |      |      |      |      |      |      |      |      |      |      |      |      |      |      |      |     |      |      |
|----------|--------|--------|------|------|------|------|------|------|------|------|------|------|------|------|------|------|------|------|-----|------|------|
|          |        | F22    | F23  | F24  | F25  | F26  | F27  | F28  | F29  | F30  | F31  | F32  | F33  | F34  | F35  | F36  | F37  | F38  | F39 | F40  | F41  |
| J1/J2/J3 | F1     | 0.00   | 0.00 | 0.25 | 0.25 | 0.25 | 0.00 | 0.00 | 0.00 | 0.00 | 0.00 | 0.25 | 0.33 | 0.33 | 0.33 | 0.25 | 0.25 | 0.25 | - * | 0.25 | 0.25 |
| J4       | F2     | 0.25   | 0.00 | 0.00 | 0.00 | 0.00 | 0.00 | 0.00 | 0.00 | 0.00 | 0.00 | 0.00 | 0.00 | 0.00 | 0.00 | 0.00 | 0.00 | 0.00 | -   | 0.00 | 0.00 |
| J1/J2/J3 | F3     | 0.00   | 0.00 | 0.50 | 0.50 | 0.50 | 0.00 | 0.00 | 0.00 | 0.00 | 0.00 | 0.50 | 0.50 | 0.50 | 0.50 | 0.50 | 0.50 | 0.50 | -   | 0.50 | 0.50 |
| J1/J2/J3 | F4     | 0.00   | 0.00 | 0.50 | 0.50 | 0.50 | 0.00 | 0.00 | 0.00 | 0.00 | 0.00 | 0.50 | 0.50 | 0.50 | 0.50 | 0.50 | 0.50 | 0.50 | -   | 0.50 | 0.50 |
| J1/J2/J3 | F5     | 0.00   | 0.00 | 0.50 | 0.50 | 0.50 | 0.00 | 0.00 | 0.00 | 0.00 | 0.00 | 0.50 | 0.50 | 0.50 | 0.50 | 0.50 | 0.50 | 0.50 | -   | 0.50 | 0.50 |
| J1/J2/J3 | F6     | 0.00   | 0.00 | 0.50 | 0.50 | 0.50 | 0.00 | 0.00 | 0.00 | 0.00 | 0.00 | 0.50 | 0.50 | 0.50 | 0.50 | 0.50 | 0.50 | 0.50 | -   | 0.50 | 0.50 |
| J1/J2/J3 | F7     | 0.00   | 0.00 | 0.50 | 0.50 | 0.50 | 0.00 | 0.00 | 0.00 | 0.00 | 0.00 | 0.50 | 0.50 | 0.50 | 0.50 | 0.50 | 0.50 | 0.50 | -   | 0.50 | 0.50 |
| J1/J2/J3 | F8     | 0.00   | 0.00 | 0.50 | 0.50 | 0.50 | 0.00 | 0.00 | 0.00 | 0.00 | 0.00 | 0.50 | 0.50 | 0.50 | 0.50 | 0.50 | 0.50 | 0.50 | -   | 0.50 | 0.50 |
| J1/J2/J3 | F9     | 0.00   | 0.00 | 0.50 | 0.50 | 0.50 | 0.00 | 0.00 | 0.00 | 0.00 | 0.00 | 0.50 | 0.50 | 0.50 | 0.50 | 0.50 | 0.50 | 0.50 | -   | 0.50 | 0.50 |
| J2       | F10    | 0.00   | 0.00 | 2.00 | 2.00 | 2.00 | 0.00 | 0.00 | 0.00 | 0.00 | 0.00 | 2.00 | 2.00 | 2.00 | 2.00 | 2.00 | 2.00 | 2.00 | -   | 2.00 | 2.00 |
| J2/J3    | F11    | 0.00   | 0.00 | 0.50 | 0.50 | 0.50 | 0.00 | 0.00 | 0.00 | 0.00 | 0.00 | 0.50 | 0.50 | 0.50 | 0.50 | 0.50 | 0.50 | 0.50 | -   | 0.50 | 0.50 |
| J6       | F12    | 0.00   | 0.00 | 0.00 | 0.00 | 0.00 | 0.00 | 0.00 | 0.00 | 0.00 | 0.00 | 0.00 | 0.00 | 0.00 | 0.00 | 0.00 | 0.00 | 0.00 | -   | 0.00 | 0.00 |
| J4       | F13    | 0.25   | 0.00 | 0.00 | 0.00 | 0.00 | 0.00 | 0.00 | 0.00 | 0.00 | 0.00 | 0.00 | 0.00 | 0.00 | 0.00 | 0.00 | 0.00 | 0.00 | -   | 0.00 | 0.00 |
| J1/J2/J3 | F14    | 0.00   | 0.00 | 0.25 | 0.25 | 0.25 | 0.00 | 0.00 | 0.00 | 0.00 | 0.00 | 0.25 | 0.33 | 0.33 | 0.33 | 0.25 | 0.25 | 0.25 | -   | 0.25 | 0.25 |
| J2       | F15    | 0.00   | 0.00 | 2.00 | 2.00 | 2.00 | 0.00 | 0.00 | 0.00 | 0.00 | 0.00 | 2.00 | 2.00 | 2.00 | 2.00 | 2.00 | 2.00 | 2.00 | -   | 2.00 | 2.00 |
| J6       | F16    | 0.00   | 0.00 | 0.00 | 0.00 | 0.00 | 0.00 | 0.00 | 0.00 | 0.00 | 0.00 | 0.00 | 0.00 | 0.00 | 0.00 | 0.00 | 0.00 | 0.00 | -   | 0.00 | 0.00 |
| J1/J2/J3 | F17    | 0.00   | 0.00 | 0.25 | 0.25 | 0.25 | 0.00 | 0.00 | 0.00 | 0.00 | 0.00 | 0.25 | 0.33 | 0.33 | 0.33 | 0.25 | 0.25 | 0.25 | -   | 0.25 | 0.25 |
| J5       | F18    | 0.00   | 0.25 | 0.00 | 0.00 | 0.00 | 0.00 | 0.00 | 0.00 | 0.00 | 0.00 | 0.00 | 0.00 | 0.00 | 0.00 | 0.00 | 0.00 | 0.00 | -   | 0.00 | 0.00 |
| J1/J2/J3 | F19    | 0.00   | 0.00 | 0.25 | 0.25 | 0.25 | 0.00 | 0.00 | 0.00 | 0.00 | 0.00 | 0.25 | 0.33 | 0.33 | 0.33 | 0.25 | 0.25 | 0.25 | -   | 0.25 | 0.25 |
| J4       | F20    | 0.25   | 0.00 | 0.00 | 0.00 | 0.00 | 0.00 | 0.00 | 0.00 | 0.00 | 0.00 | 0.00 | 0.00 | 0.00 | 0.00 | 0.00 | 0.00 | 0.00 | -   | 0.00 | 0.00 |
| J5       | F21    | 0.00   | 0.25 | 0.00 | 0.00 | 0.00 | 0.00 | 0.00 | 0.00 | 0.00 | 0.00 | 0.00 | 0.00 | 0.00 | 0.00 | 0.00 | 0.00 | 0.00 | -   | 0.00 | 0.00 |

\* (-) impossible changeover

Table S9. (Continued)

| Line     | Family | Family |      |      |      |      |      |      |      |      |      |      |      |      |      |      |      |      |      |      |      |
|----------|--------|--------|------|------|------|------|------|------|------|------|------|------|------|------|------|------|------|------|------|------|------|
|          |        | F22    | F23  | F24  | F25  | F26  | F27  | F28  | F29  | F30  | F31  | F32  | F33  | F34  | F35  | F36  | F37  | F38  | F39  | F40  | F41  |
| J4       | F22    | 0.00   | 0.00 | 0.00 | 0.00 | 0.00 | 0.00 | 0.00 | 0.00 | 0.00 | 0.00 | 0.00 | 0.00 | 0.00 | 0.00 | 0.00 | 0.00 | 0.00 | - *  | 0.00 | 0.00 |
| J5       | F23    | 0.00   | 0.00 | 0.00 | 0.00 | 0.00 | 0.00 | 0.00 | 0.00 | 0.00 | 0.00 | 0.00 | 0.00 | 0.00 | 0.00 | 0.00 | 0.00 | 0.00 | -    | 0.00 | 0.00 |
| J1/J2/J3 | F24    | 0.00   | 0.00 | 0.00 | 0.25 | 0.25 | 0.00 | 0.00 | 0.00 | 0.00 | 0.00 | 0.25 | 0.33 | 0.33 | 0.33 | 0.25 | 0.25 | 0.25 | -    | 0.25 | 0.25 |
| J1/J2    | F25    | 0.00   | 0.00 | 0.25 | 0.00 | 0.25 | 0.00 | 0.00 | 0.00 | 0.00 | 0.00 | 0.25 | 0.33 | 0.33 | 0.33 | 0.25 | 0.25 | 0.25 | -    | 0.25 | 0.25 |
| J1/J2/J3 | F26    | 0.00   | 0.00 | 0.25 | 0.25 | 0.00 | 0.00 | 0.00 | 0.00 | 0.00 | 0.00 | 0.25 | 0.33 | 0.33 | 0.33 | 0.25 | 0.25 | 0.25 | -    | 0.25 | 0.25 |
| J7       | F27    | 0.00   | 0.00 | 0.00 | 0.00 | 0.00 | 0.00 | 0.42 | 0.42 | 0.42 | -    | 0.00 | 0.00 | 0.00 | 0.00 | 0.00 | 0.00 | 0.00 | -    | 0.00 | 0.00 |
| J7       | F28    | 0.00   | 0.00 | 0.00 | 0.00 | 0.00 | 0.42 | 0.00 | 0.42 | 0.42 | -    | 0.00 | 0.00 | 0.00 | 0.00 | 0.00 | -    | 0.00 | -    | 0.00 | 0.00 |
| J7       | F29    | 0.00   | 0.00 | 0.00 | 0.00 | 0.00 | -    | -    | 0.00 | 0.42 | -    | 0.00 | 0.00 | 0.00 | 0.00 | 0.00 | 0.00 | 0.00 | -    | 0.00 | 0.00 |
| J7       | F30    | 0.00   | 0.00 | 0.00 | 0.00 | 0.00 | -    | -    | -    | 0.00 | -    | 0.00 | 0.00 | 0.00 | 0.00 | 0.00 | 0.00 | 0.00 | -    | 0.00 | 0.00 |
| J7       | F31    | 0.00   | 0.00 | 0.00 | 0.00 | 0.00 | 0.42 | 0.42 | 0.42 | 0.42 | 0.00 | 0.00 | 0.00 | 0.00 | 0.00 | 0.00 | 0.00 | 0.00 | -    | 0.00 | 0.00 |
| J1/J2/J3 | F32    | 0.00   | 0.00 | 0.25 | 0.25 | 0.25 | 0.00 | 0.00 | 0.00 | 0.00 | 0.00 | 0.00 | 0.33 | 0.33 | 0.33 | 0.25 | 0.25 | 0.25 | -    | 0.25 | 0.25 |
| J1/J2/J3 | F33    | 0.00   | 0.00 | 0.50 | 0.50 | 0.50 | 0.00 | 0.00 | 0.00 | 0.00 | 0.00 | -    | 0.00 | -    | 0.33 | 0.50 | 0.50 | 0.50 | -    | 0.50 | 0.50 |
| J1/J2/J3 | F34    | 0.00   | 0.00 | 0.50 | 0.50 | 0.50 | 0.00 | 0.00 | 0.00 | 0.00 | 0.00 | -    | 0.33 | 0.00 | 0.33 | 0.50 | 0.50 | 0.50 | -    | 0.50 | 0.50 |
| J1/J2/J3 | F35    | -      | -    | -    | -    | -    | -    | -    | -    | -    | -    | -    | -    | -    | 0.00 | -    | -    | -    | -    | -    | -    |
| J1/J2/J3 | F36    | 0.00   | 0.00 | 0.25 | 0.25 | 0.25 | 0.00 | 0.00 | 0.00 | 0.00 | 0.00 | 0.25 | 0.33 | 0.33 | 0.33 | 0.00 | 0.25 | 0.25 | -    | 0.25 | 0.25 |
| J1/J2    | F37    | 0.00   | 0.00 | 0.25 | 0.25 | 0.25 | 0.00 | 0.00 | 0.00 | 0.00 | 0.00 | 0.25 | 0.33 | 0.33 | 0.33 | 0.33 | 0.00 | 0.25 | -    | 0.25 | 0.25 |
| J1/J2/J3 | F38    | 0.00   | 0.00 | 0.25 | 0.25 | 0.25 | 0.00 | 0.00 | 0.00 | 0.00 | 0.00 | 0.25 | 0.33 | 0.33 | 0.33 | 0.33 | 0.25 | 0.00 | -    | 0.25 | 0.25 |
| J1/J2/J3 | F39    | 0.00   | 0.00 | 0.25 | 0.25 | 0.25 | 0.00 | 0.00 | 0.00 | 0.00 | 0.00 | 0.25 | 0.33 | 0.33 | 0.33 | 0.33 | 0.25 | 0.25 | 0.00 | 0.25 | 0.25 |
| J1/J2    | F40    | 0.00   | 0.00 | 0.25 | 0.25 | 0.25 | 0.00 | 0.00 | 0.00 | 0.00 | 0.00 | 0.25 | 0.33 | 0.33 | 0.33 | 0.33 | 0.25 | 0.25 | -    | 0.00 | 0.25 |
| J1/J2    | F41    | 0.00   | 0.00 | 0.25 | 0.25 | 0.25 | 0.00 | 0.00 | 0.00 | 0.00 | 0.00 | 0.25 | 0.33 | 0.33 | 0.33 | 0.33 | 0.25 | 0.25 | -    | 0.25 | 0.00 |

\* (-) impossible changeover
